# Supplementary material for: Modular Breath Analyzer (MBA): Introduction of a Breath Analyzer Platform Based on an Innovative and Unique, Modular eNose Concept for Breath Diagnostics and Utilization of Calibration Transfer Methods in Breath Analysis Studies
Source: MDPI journal article supplement (doi:10.3390/molecules26123776), 2021-06-21
Supplement: s1 [file s1]

## Supplementary Materials

# Modular Breath Analyzer (MBA): Introduction of a breath analyzer platform based on an innovative and unique, modular eNose concept for breath diagnostics and utilization of calibration transfer methods in breath analysis studies.

**Authors:** Carsten Jaeschke <sup>1,†</sup>, Marta Padilla <sup>2,†</sup>, Johannes Glöckler <sup>1,†</sup>, Inese Polaka <sup>3</sup>, Martins Leja <sup>3</sup>, Viktors Veliks <sup>3</sup>, Jan Mitrovics <sup>2</sup>, Marcis Leja <sup>3</sup> and Boris Mizaikoff <sup>1,\*</sup>

<sup>1</sup> University of Ulm, Institute of Analytical and Bioanalytical Chemistry, Albert-Einstein-Allee 11, 89081 Ulm, Germany.

<sup>2</sup> JLM Innovation GmbH, Vor dem Kreuzberg 17, 72070 Tuebingen, Germany.

<sup>3</sup> Institute of Clinical and Preventive Medicine, University of Latvia, Riga, Latvia.

\* Correspondence: boris.mizaikoff@uni-ulm.de; Tel.: +49-731-5022750

† These authors contributed equally.

## Table of Content

**Figure S1.** Internal view with description of the three main units of the Modular Breath Analyzer (MBA) platform for laboratory and clinical use.

**Table S1.** List of integrated analog sensors, number of obtained signals from each sensor and used heater voltages (adapted with permission from Jaeschke et al. [1] Copyright 2018 by the authors).

**Table S2.** List of integrated digital sensors, number of obtained signals from each sensor and used heater voltages (adapted with permission from Jaeschke et al. [1] Copyright 2018 by the authors).

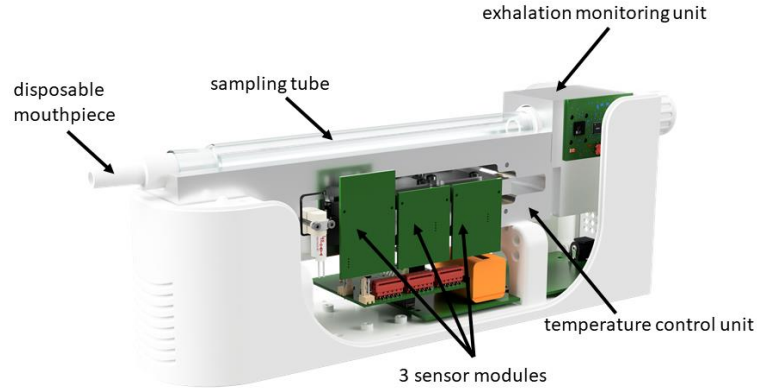

**Figure S1.** Internal view with description of the three main units of the Modular Breath Analyzer (MBA) platform for laboratory and clinical use.

**Table S1.** List of integrated analog sensors, number of obtained signals from each sensor and used heater voltages (adapted with permission from Jaeschke et al. [1] Copyright 2018 by the authors).

| Sensor type | Nr. of incorporated sensors | Sensor output signals | Heater voltage [V]                           | References |
|-------------|-----------------------------|-----------------------|----------------------------------------------|------------|
| MICS 6814   | 1                           | 3                     | NH <sub>3</sub> : 2.2<br>red: 2.4<br>ox: 1.7 | [2]        |
| MICS 4514   | 1                           | 2                     | red: 2.4<br>ox: 1.7                          | [3]        |
| TGS 8100    | 1                           | 1                     | 1.8                                          | [4]        |
| CCS 801     | 2                           | 1                     | 1.8                                          | [5]        |

**Table S2.** List of integrated digital sensors, number of obtained signals from each sensor and used heater voltages (adapted with permission from Jaeschke et al. [1] Copyright 2018 by the authors).

| Sensor type | Num of incorporated sensors | Sensor output signals | Applied supply voltage [V] | Applied temp mode | References |
|-------------|-----------------------------|-----------------------|----------------------------|-------------------|------------|
| CCS 811     | 2                           | 1                     | 1.8                        | -                 | [6]        |
| SGP30       | 2                           | 2                     | 1.8                        | -                 | [7]        |
| ZMOD 4410   | 2                           | 3*                    | 1.8                        | Ramp and Flat     | [8]        |
| BME 680     | 2                           | 4**                   | 1.8                        | -                 | [9]        |

\*controlled via Firmware (e.g. ramps), \*\* temperature, humidity, pressure and VOC

## References

1. Jaeschke, C.; Gonzalez, O.; Glöckler, J.J.; Hagemann, L.T.; Richardson, K.E.; Adrover, F.; Padilla, M.; Mitrovics, J.; Mizaikoff, B. A Novel Modular eNose System Based on Commercial MOX Sensors to Detect Low Concentrations of VOCs for Breath Gas Analysis. In Proceedings of the Multidisciplinary Digital Publishing Institute Proceedings; **2018**; Vol. 2, p. 993.
2. SGX Datasheet MiCS-6814 Available online: [https://www.sgxsensortech.com/content/uploads/2015/02/1143\\_Datasheet-MiCS-6814-rev-8.pdf](https://www.sgxsensortech.com/content/uploads/2015/02/1143_Datasheet-MiCS-6814-rev-8.pdf) (accessed on May 4, 2021).
3. SGX Datasheet MiCS-4514 Available online: [https://www.sgxsensortech.com/content/uploads/2014/08/0278\\_Datasheet-MiCS-4514.pdf](https://www.sgxsensortech.com/content/uploads/2014/08/0278_Datasheet-MiCS-4514.pdf) (accessed on May 4, 2021).
4. Figaro Datasheet TGS8100 Available online: [https://www.figaro.co.jp/en/product/docs/tgs8100\\_product\\_information\(en\)\\_rev06.pdf](https://www.figaro.co.jp/en/product/docs/tgs8100_product_information(en)_rev06.pdf) (accessed on May 4, 2021).
5. AMS Datasheet CCS 801 Available online: [https://ams.com/documents/20143/36005/CCS801\\_DS000457\\_3-00.pdf/59f95f8c-2db9-91f8-c696-0056aa4cca55](https://ams.com/documents/20143/36005/CCS801_DS000457_3-00.pdf/59f95f8c-2db9-91f8-c696-0056aa4cca55) (accessed on May 4, 2021).
6. AMS Datasheet CCS 811 Available online: [https://ams.com/documents/20143/36005/CCS811\\_DS000459\\_7-00.pdf/3cfdaea5-b602-fe28-1a14-18776b61a35a](https://ams.com/documents/20143/36005/CCS811_DS000459_7-00.pdf/3cfdaea5-b602-fe28-1a14-18776b61a35a) (accessed on May 4, 2021).
7. Sensirion Datasheet SGP30 Available online: [https://www.sensirion.com/fileadmin/user\\_upload/customers/sensirion/Dokumente/0\\_Datasheets/Gas/Sensirion\\_Gas\\_Sensors\\_SGP30\\_Datasheet.pdf](https://www.sensirion.com/fileadmin/user_upload/customers/sensirion/Dokumente/0_Datasheets/Gas/Sensirion_Gas_Sensors_SGP30_Datasheet.pdf) (accessed on May 4, 2021).
8. IDT Datasheet ZMOD4410 Available online: <https://www.idt.com/document/dst/zmod4410-datasheet> (accessed on May 4, 2021).
9. Bosch Datasheet BME680 Available online: [https://ae-bst.resource.bosch.com/media/\\_tech/media/datasheets/BST-BME680-DS001-00.pdf](https://ae-bst.resource.bosch.com/media/_tech/media/datasheets/BST-BME680-DS001-00.pdf) (accessed on May 4, 2021).
